# Supplementary material for: Effect of the length of the alkyl chains in porphyrin meso-substituents on the performance of dye-sensitized solar cells
Source: Royal Society of Chemistry journal article supplement (doi:10.1039/c3ra46212a), 2013-12-06
Supplement: c3ra46212a.pdf [file c3ra46212a.pdf]

## Electronic Supplementary Information

# Effect of the Length of Alkyl Chain in the Porphyrin Meso-Substituent on the Performance of the Dye-Sensitized Solar Cells

Xiaodong Xue, Weihong Zhang, Nuonuo Zhang, Chenggong Ju, Xiao

Peng, Yanbo Yang, Yuxia Liang, Yaqing Feng, Bao Zhang\*

School of Chemical Engineering and Technology, Tianjin University, 92 Weijin Road,  
Tianjin 300072

Tel: (86)-22-2789-2323

\* Email: [baozhang@tju.edu.cn](mailto:baozhang@tju.edu.cn)

**\*Corresponding Author: Bao Zhang**  
**Telephone number: (86)-22-2789-2323**  
**E-mail address: [baozhang@tju.edu.cn](mailto:baozhang@tju.edu.cn)**

### Table of contents

|                                                                                                                                     |     |
|-------------------------------------------------------------------------------------------------------------------------------------|-----|
| Figure S1. <sup>1</sup> H NMR spectrum of <b>2a</b>                                                                                 | S2  |
| Figure S2. <sup>1</sup> H NMR spectrum of <b>2b</b>                                                                                 | S2  |
| Figure S3. <sup>1</sup> H NMR spectrum of <b>2c</b>                                                                                 | S3  |
| Figure S4. <sup>1</sup> H NMR spectrum of <b>3a</b>                                                                                 | S3  |
| Figure S5. <sup>1</sup> H NMR spectrum of <b>4a</b>                                                                                 | S4  |
| Figure S6. <sup>1</sup> H NMR spectrum of <b>CZ-4</b>                                                                               | S4  |
| Figure S7. <sup>1</sup> H NMR spectrum of <b>3b</b>                                                                                 | S5  |
| Figure S8. <sup>1</sup> H NMR spectrum of <b>4b</b>                                                                                 | S5  |
| Figure S9. <sup>1</sup> H NMR spectrum of <b>CZ-6</b>                                                                               | S6  |
| Figure S10. <sup>1</sup> H NMR spectrum of <b>3c</b>                                                                                | S6  |
| Figure S11. <sup>1</sup> H NMR spectrum of <b>4c</b>                                                                                | S7  |
| Figure S12. <sup>1</sup> H NMR spectrum of <b>CZ-10</b>                                                                             | S7  |
| Figure S13. MALDI-TOF MS of <b>3a</b>                                                                                               | S8  |
| Figure S14. MALDI-TOF MS of <b>4a</b>                                                                                               | S8  |
| Figure S15. MALDI-TOF MS of <b>CZ-4</b>                                                                                             | S9  |
| Figure S16. MALDI-TOF MS of <b>3b</b>                                                                                               | S9  |
| Figure S17. MALDI-TOF MS of <b>4b</b>                                                                                               | S10 |
| Figure S18. MALDI-TOF MS of <b>CZ-6</b>                                                                                             | S10 |
| Figure S19. MALDI-TOF MS of <b>3c</b>                                                                                               | S11 |
| Figure S20. MALDI-TOF MS of <b>4c</b>                                                                                               | S11 |
| Figure S21. MALDI-TOF MS of <b>CZ-10</b>                                                                                            | S12 |
| Figure S22 Cyclic voltammetry of a) dye <b>CZ-4</b> , b) dye <b>CZ-6</b> , c) dye <b>CZ-10</b> , d) <b>Fc</b> in CH <sub>3</sub> CN | S1  |

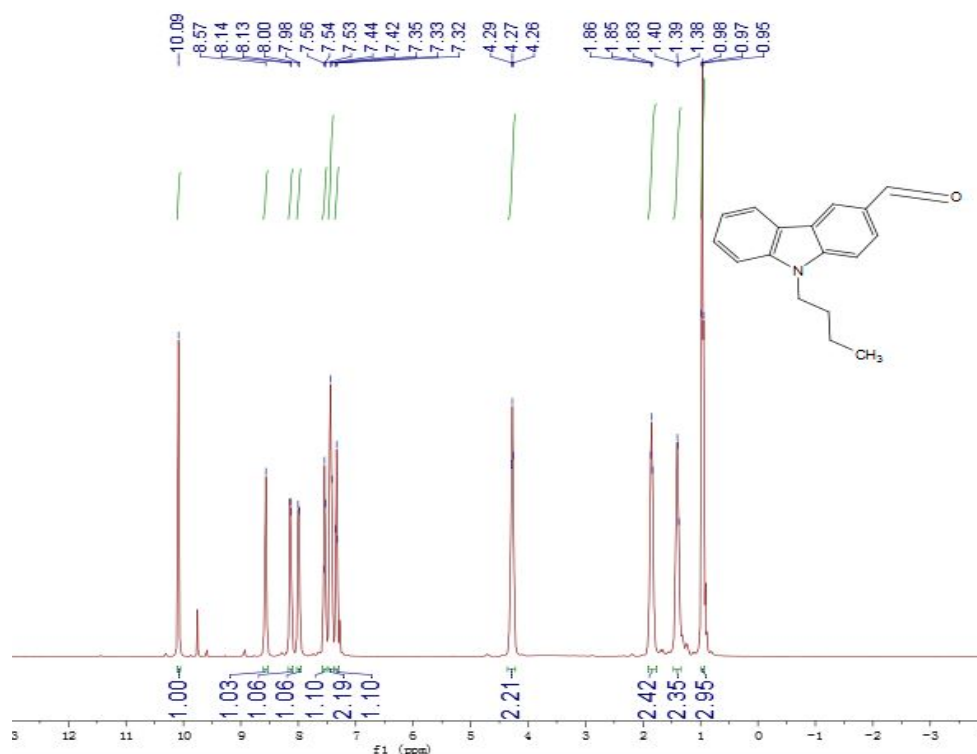

Figure S1. <sup>1</sup>H NMR spectrum of 2a

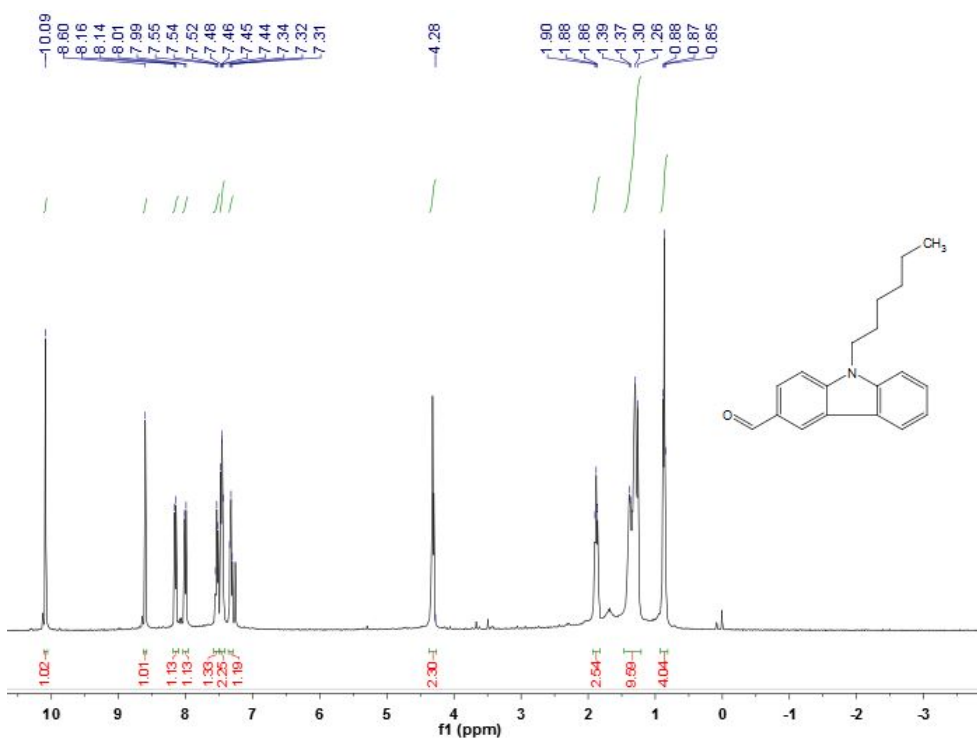

Figure S2. <sup>1</sup>H NMR spectrum of 2b

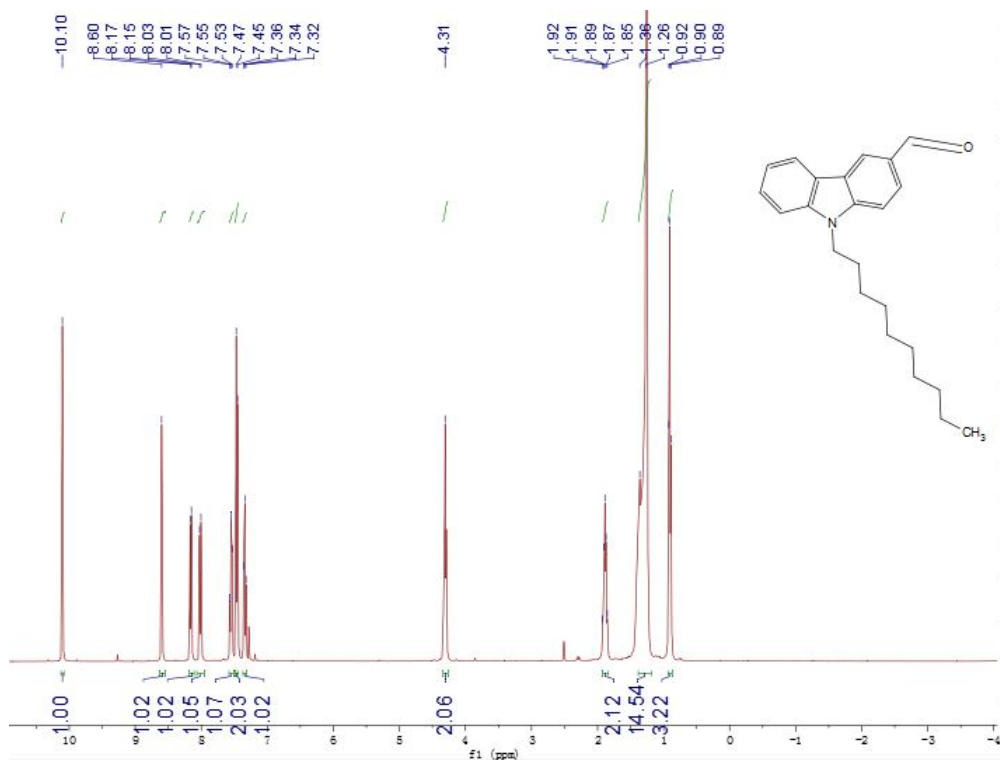

Figure S3.  $^1\text{H}$  NMR spectrum of **2c**

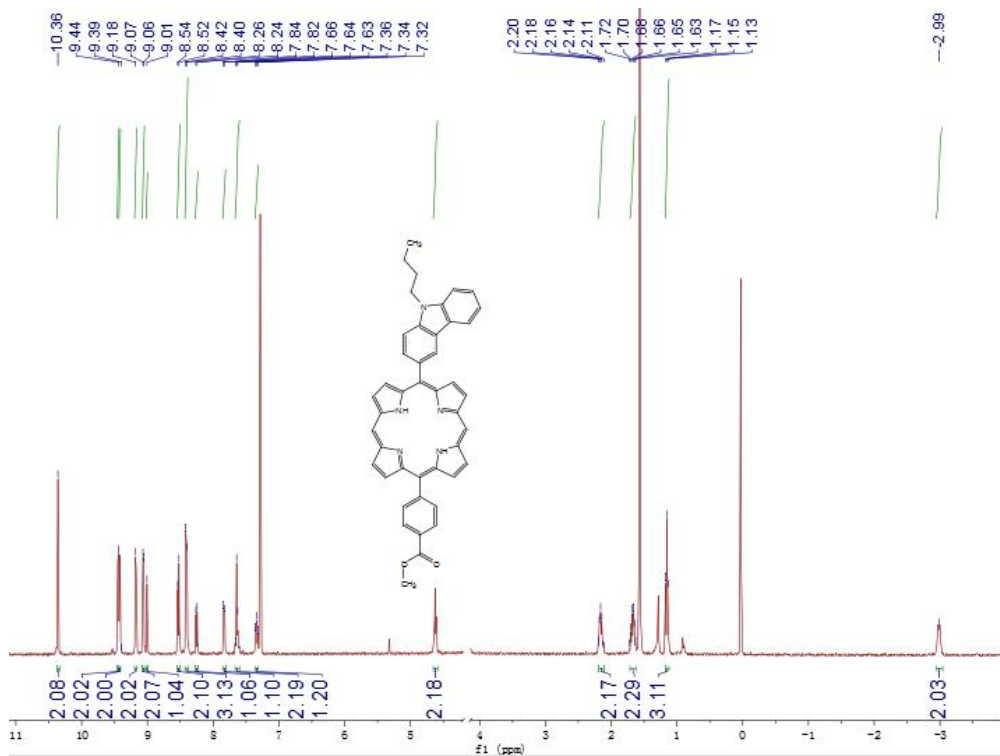

Figure S4.  $^1\text{H}$  NMR spectrum of **3a**

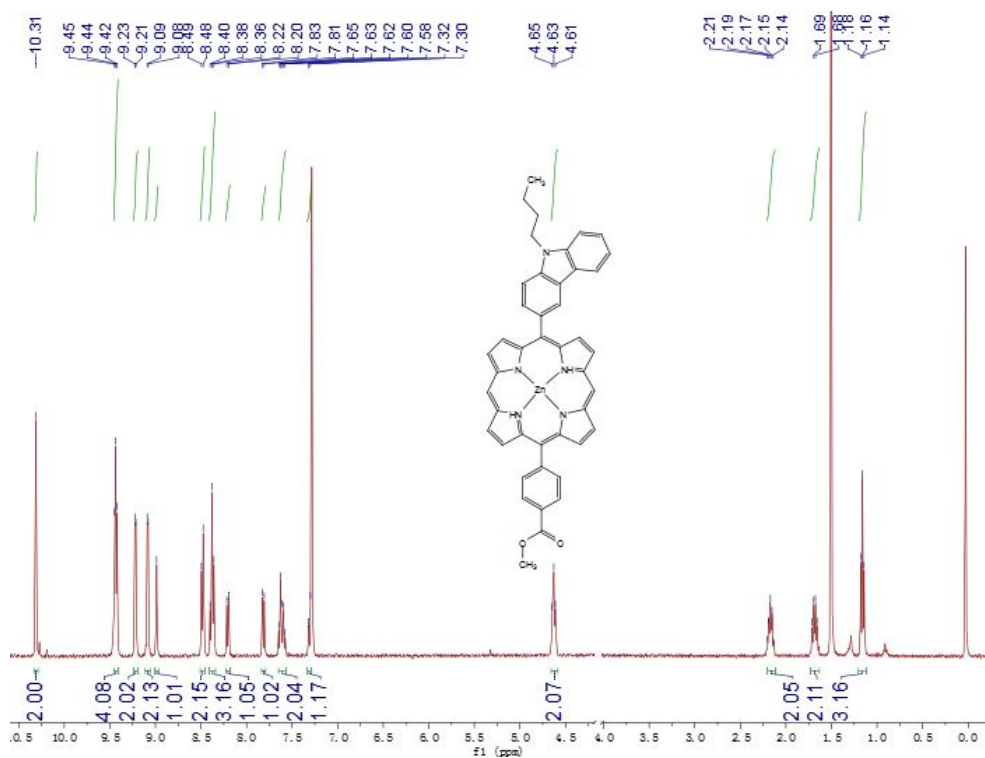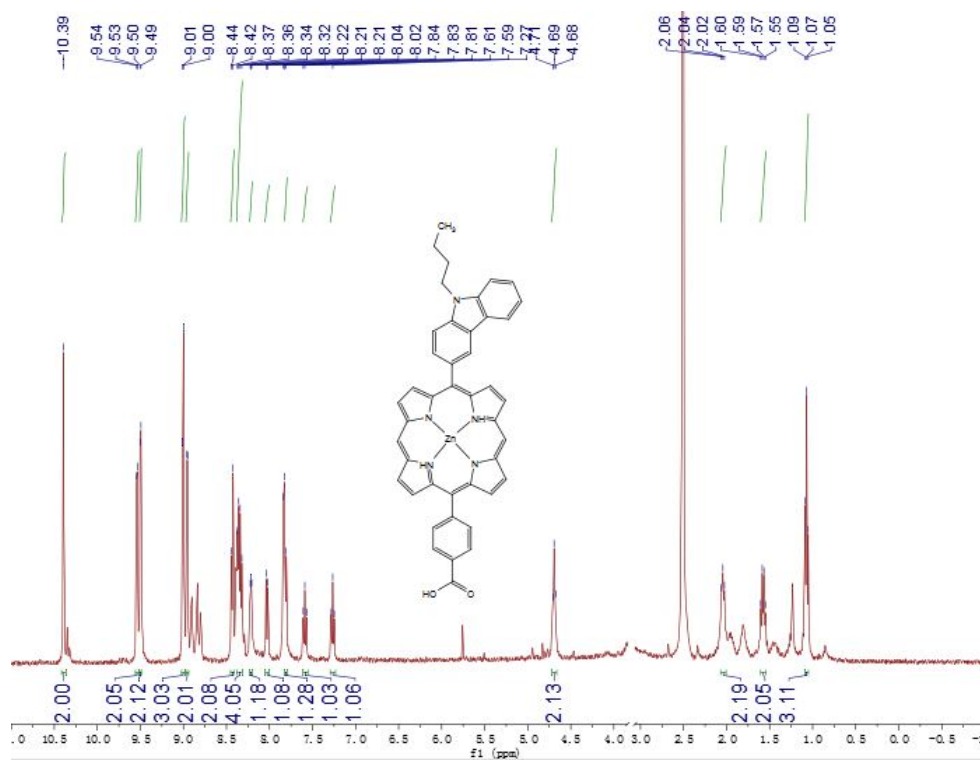



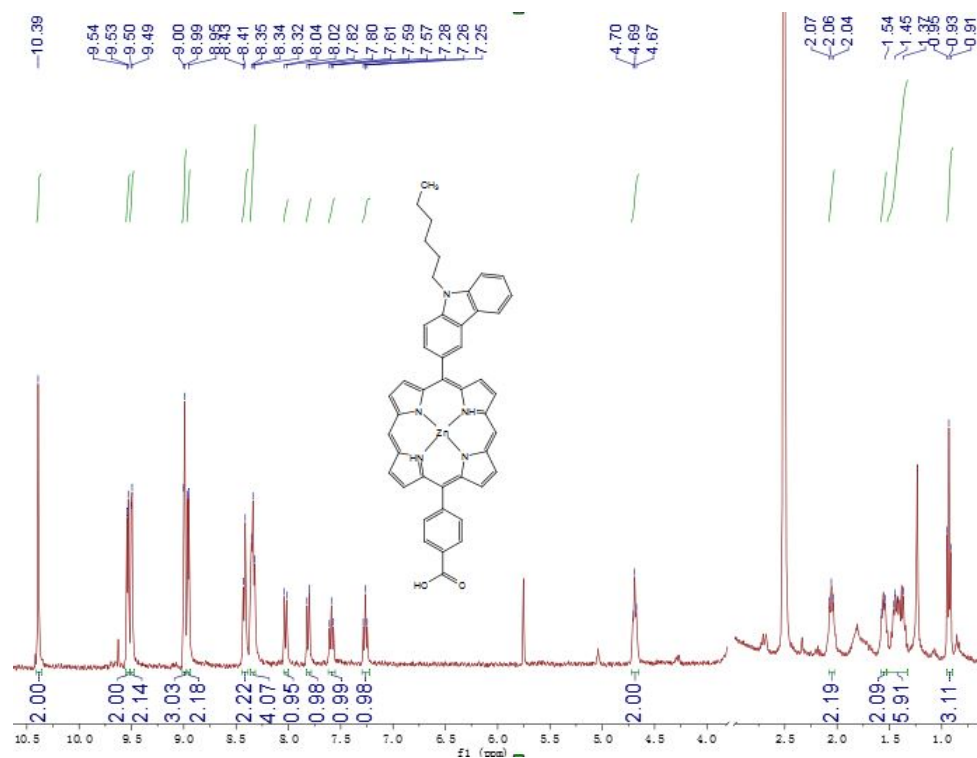

Figure S9. <sup>1</sup>H NMR spectrum of CZ-6

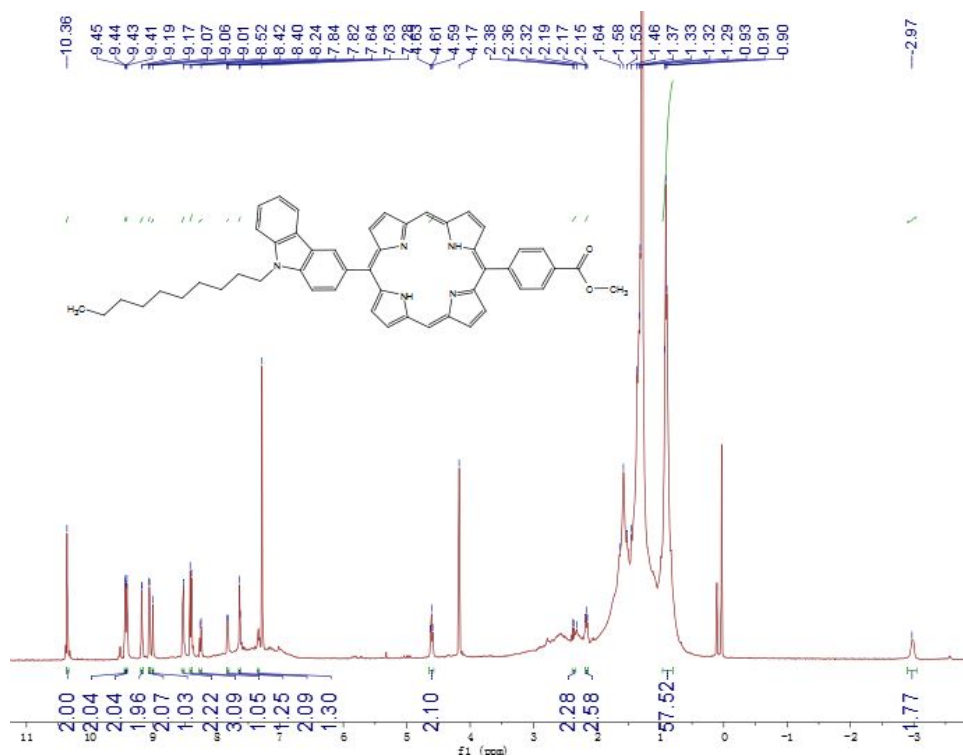

Figure S10. <sup>1</sup>H NMR spectrum of 3c

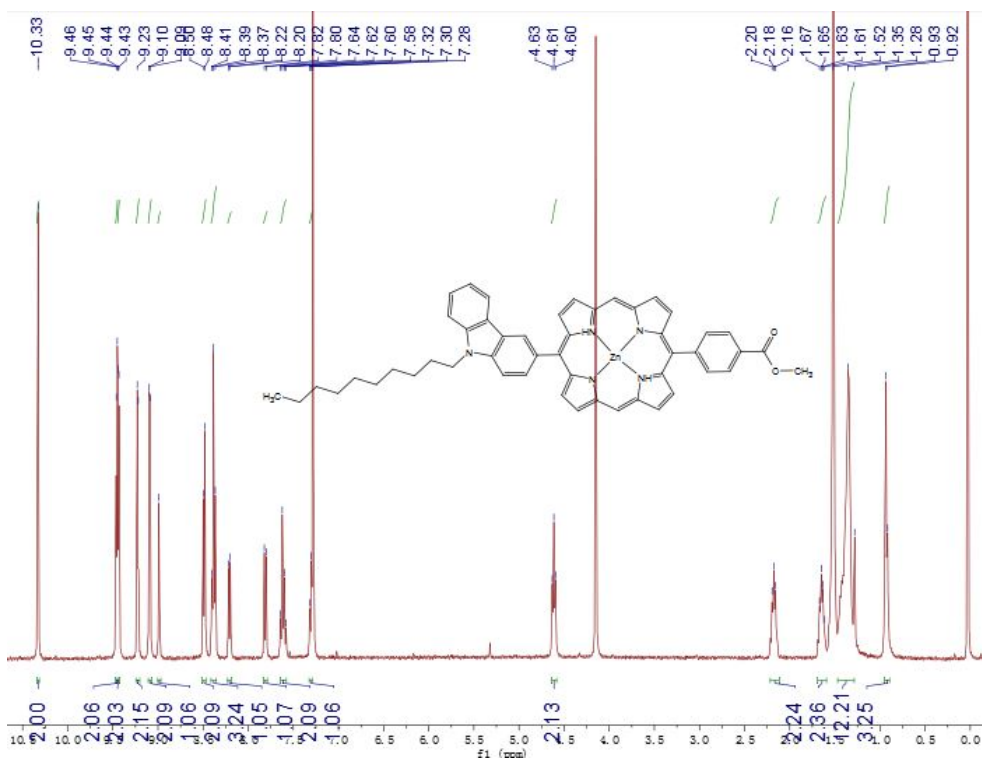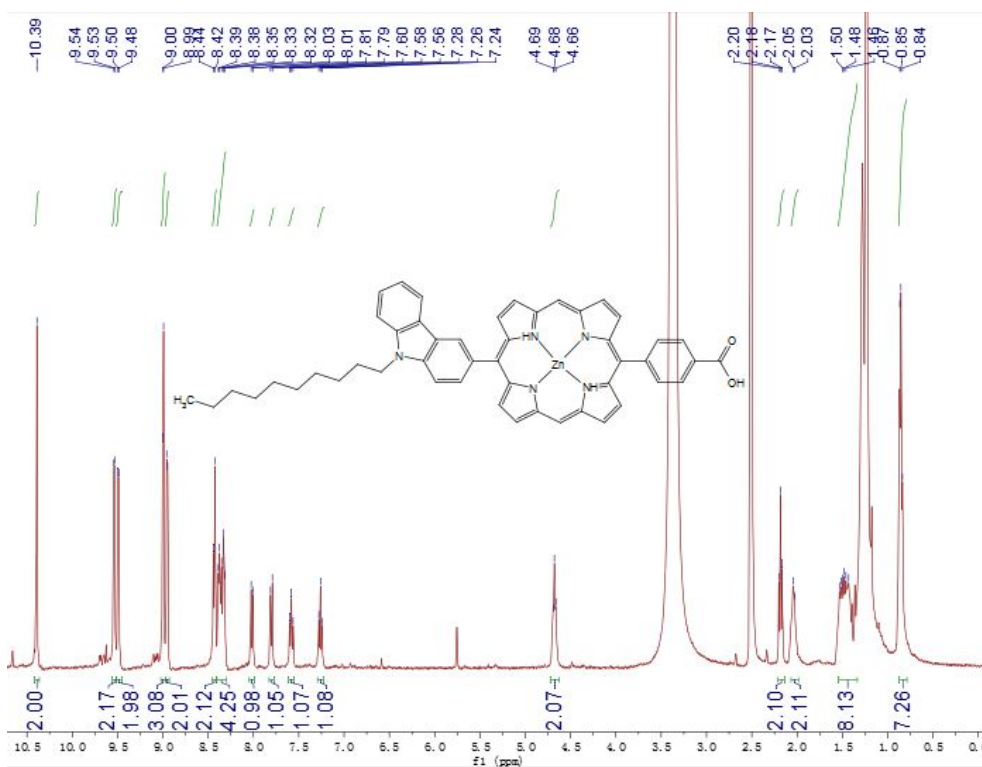

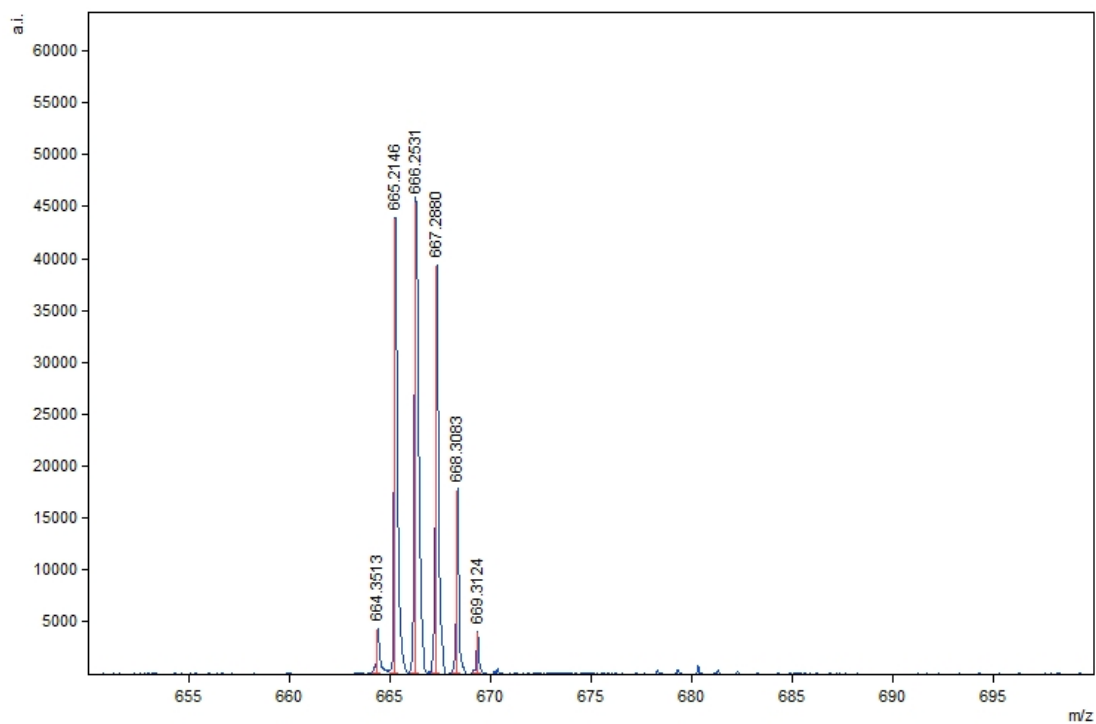

Figure S13. MALDI-TOF MS of **3a**

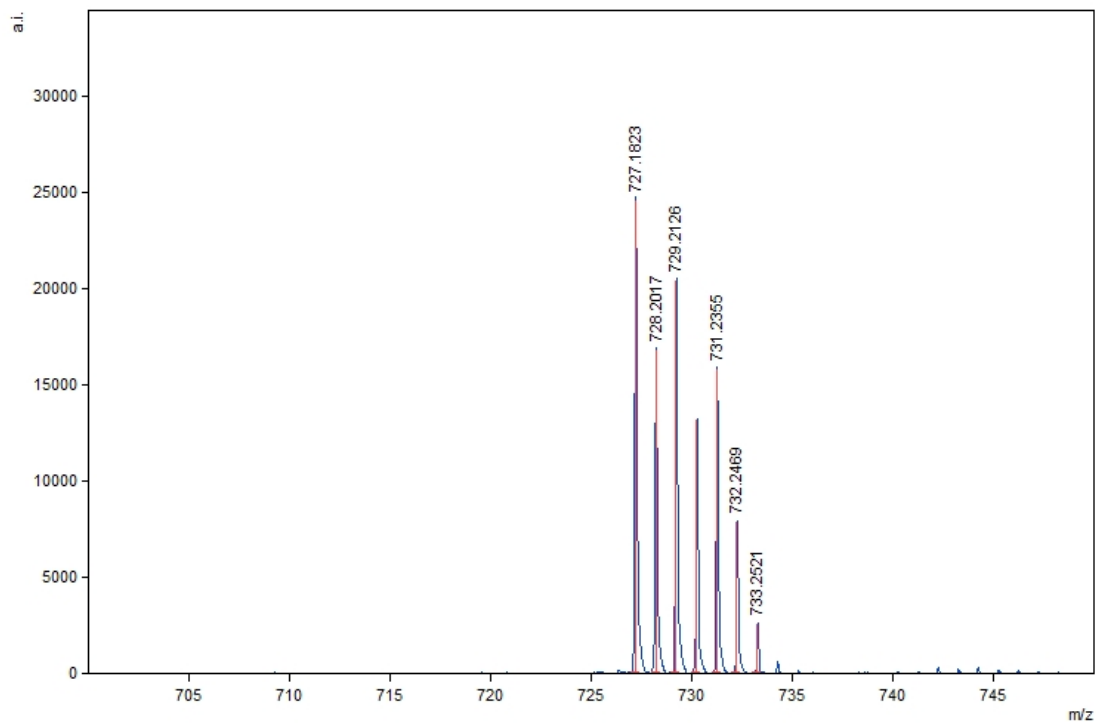

Figure S14. MALDI-TOF MS of **4a**



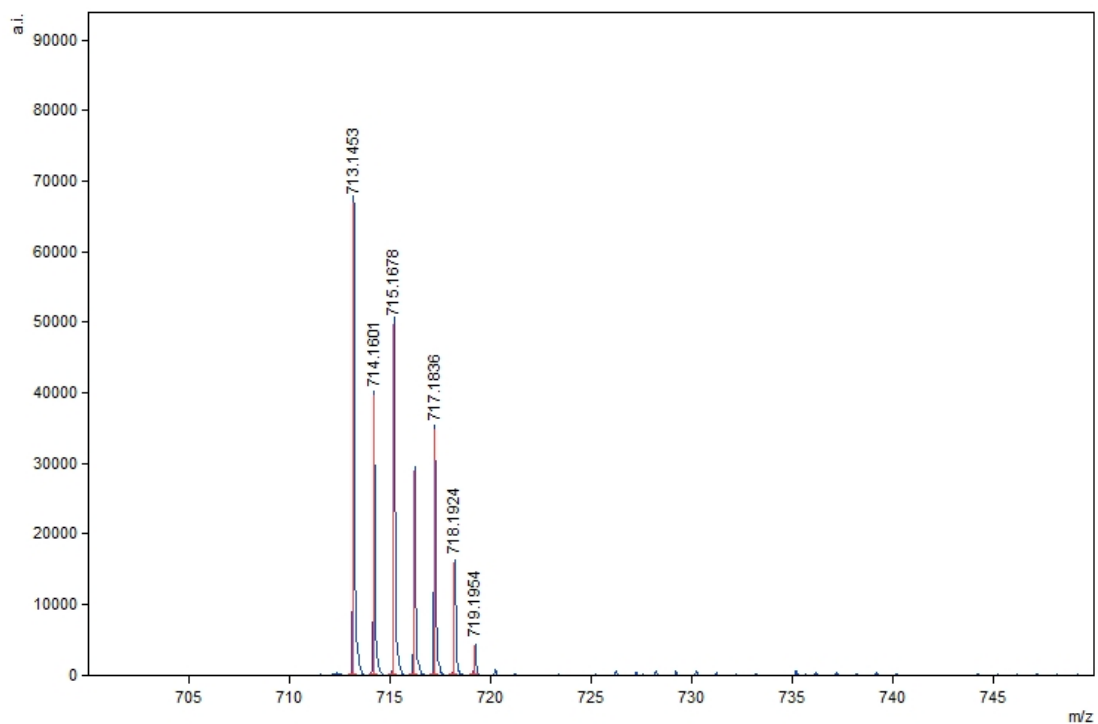

Figure S15. MALDI-TOF MS of **CZ-4**

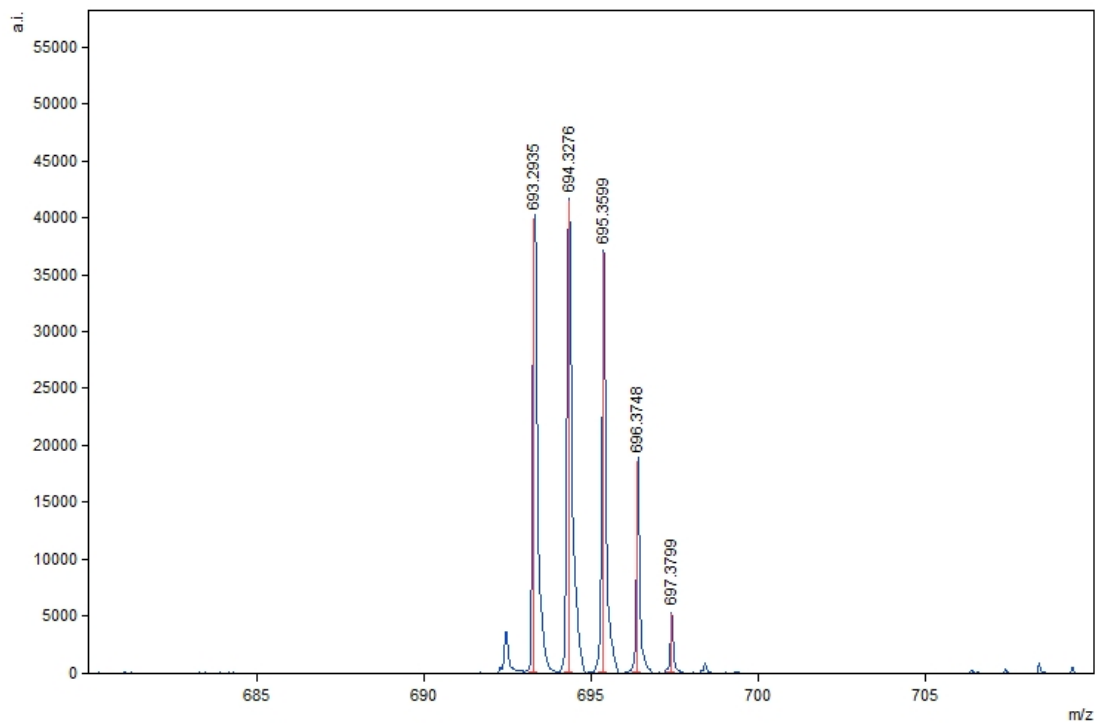

Figure S16. MALDI-TOF MS of **3b**

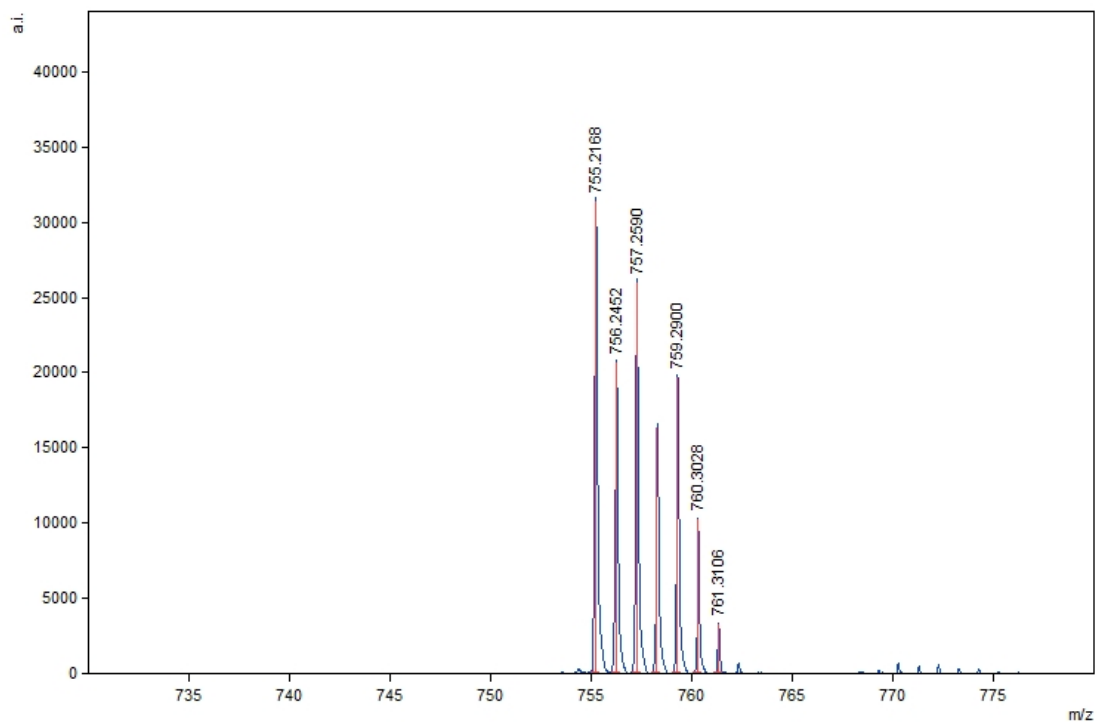

Figure S17. MALDI-TOF MS of **4b**

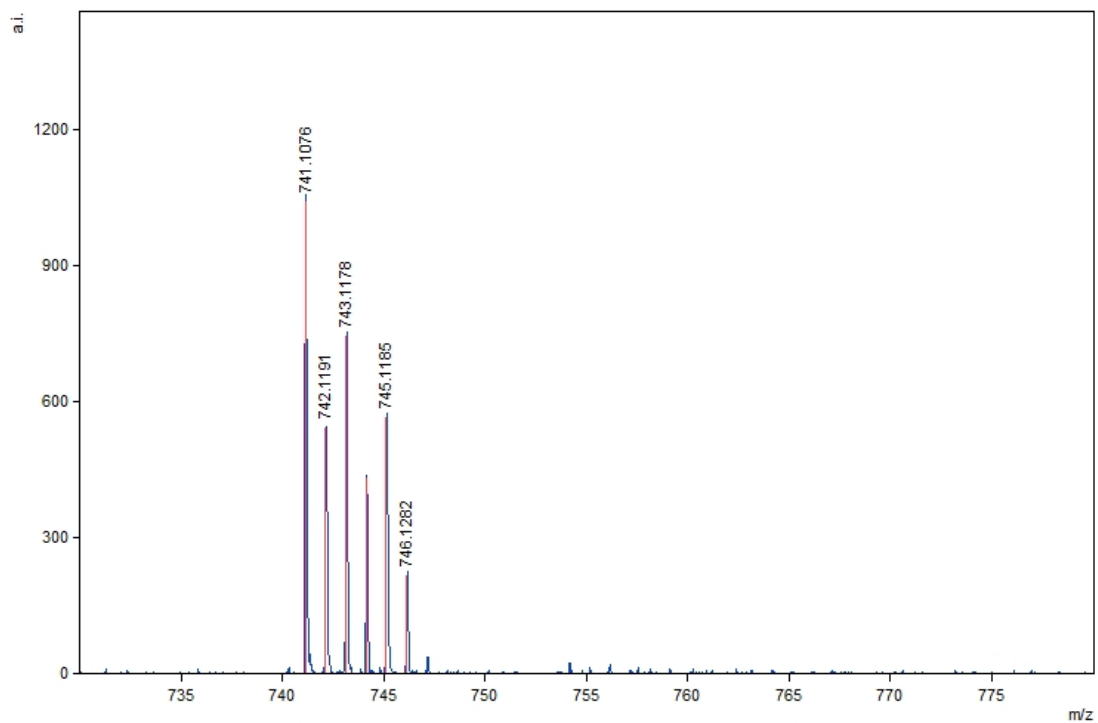

Figure S18. MALDI-TOF MS of **CZ-6**

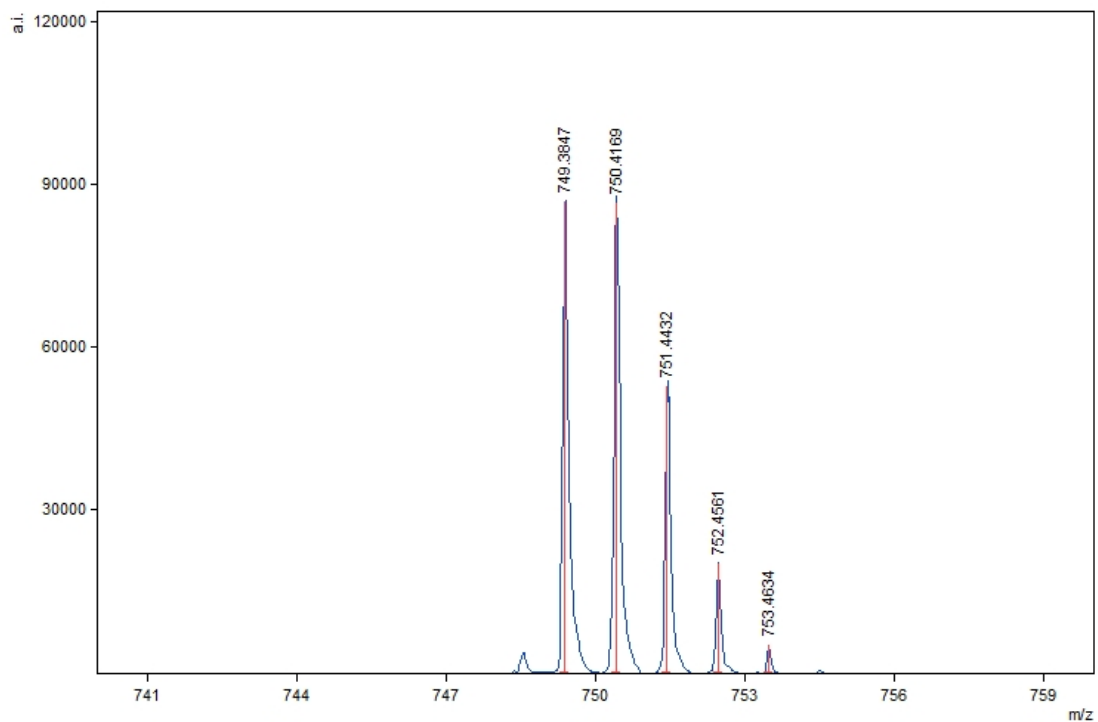

Figure S19. MALDI-TOF MS of **3c**

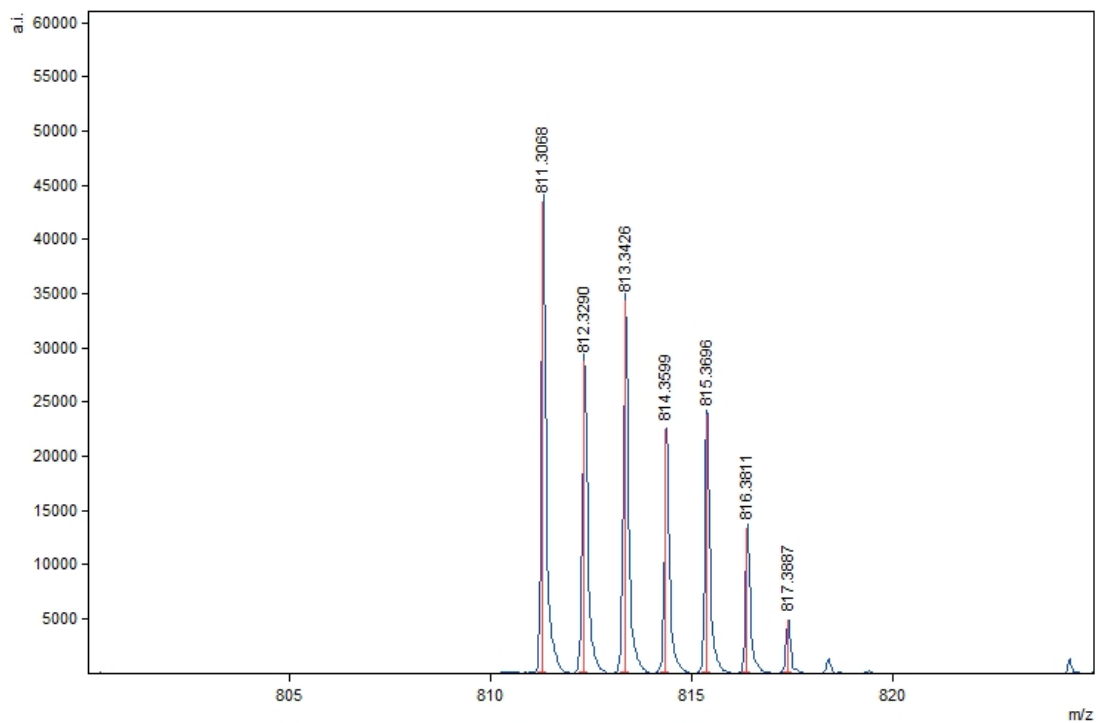

Figure S20. MALDI-TOF MS of **4c**

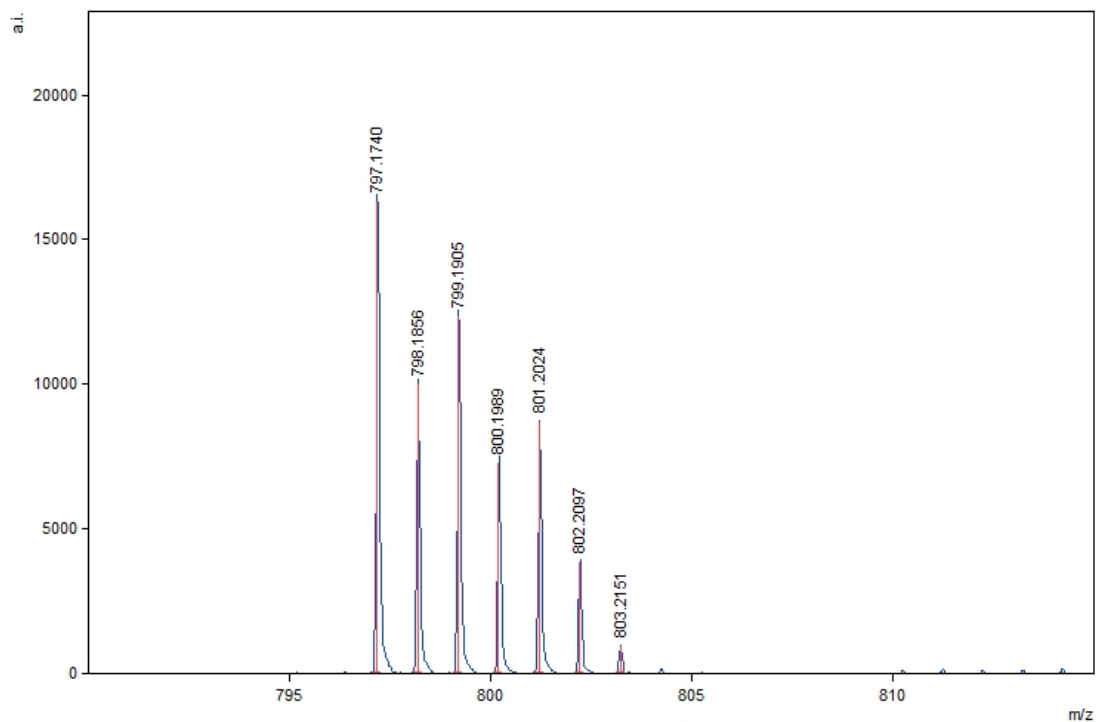

Figure S21. MALDI-TOF MS of **CZ-10**

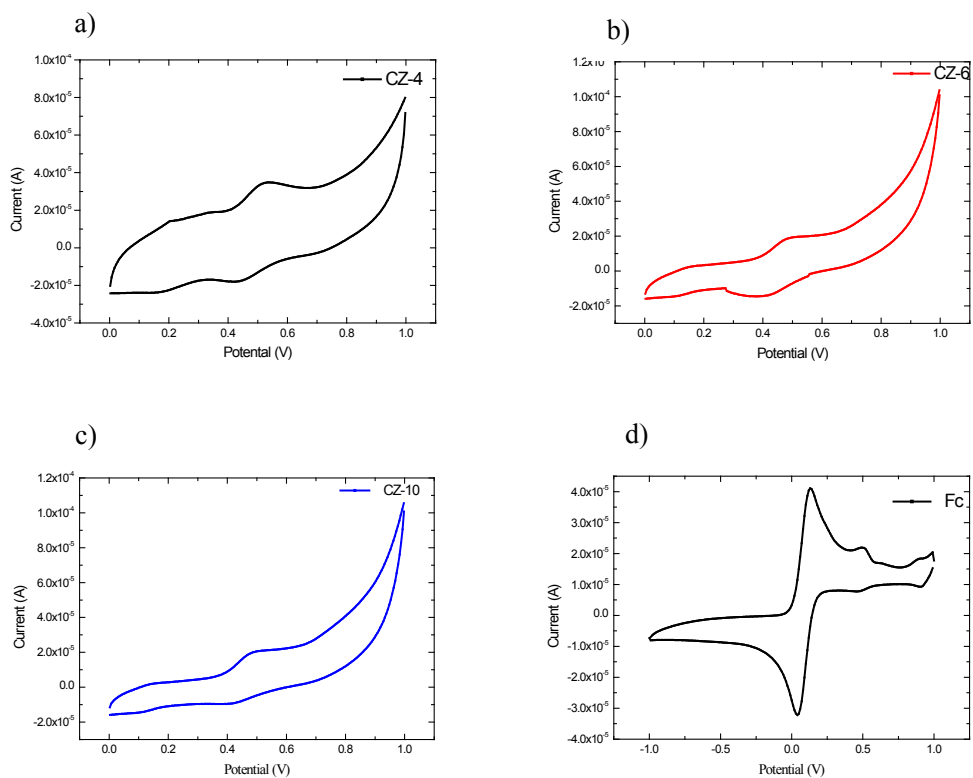

Figure S22 Cyclic voltammetry of a) dye **CZ-4**, b) dye **CZ-6**, c) dye **CZ-10**, d) **Fc** in  $\text{CH}_3\text{CN}$
